# Supplementary material
Source: PubMed Central journal article supplement (PMC3612978)
Supplement: NIHMS371481-supplement-01.pdf [file NIHMS371481-supplement-01.pdf]

## SUPPLEMENTAL TABLES

**Supplemental Table 1. Additional beta power and coherence correlations with 18-month cognitive score**

| EEG Beta Power                    | Pearson Correlation | P Value |
|-----------------------------------|---------------------|---------|
| Left Temporal                     | 0.161               | 0.6     |
| Left Parietal                     | 0.425               | 0.168   |
| Left Occipital                    | 0.375               | 0.207   |
| Right Temporal                    | 0.261               | 0.39    |
| Right Parietal                    | 0.351               | 0.24    |
| Right Occipital                   | 0.314               | 0.297   |
| EEG Beta Coherence                | Pearson Correlation | P Value |
| Left Temporal to Right Temporal   | -0.223              | 0.463   |
| Left Parietal to Right Parietal   | -0.094              | 0.76    |
| Left Occipital to Right Occipital | 0.245               | 0.421   |

**Alternative Supplemental Table 1. Beta power and coherence correlations with 18-month cognitive, language, and motor scores**

| EEG beta power                            | Pearson Correlation Cognitive Score | P value | Pearson Correlation Language Score | P value | Pearson Correlation Motor Score | P value |
|-------------------------------------------|-------------------------------------|---------|------------------------------------|---------|---------------------------------|---------|
| Left Frontal Polar                        | .583                                | 0.04    | .434                               | 0.14    | -.125                           | 0.69    |
| Left Frontal                              | .769*                               | 0.002   | .350                               | 0.24    | -.267                           | 0.38    |
| Left Temporal                             | .161                                | 0.6     | .416                               | 0.16    | .098                            | 0.75    |
| Left Parietal                             | .425                                | 0.17    | .845*                              | 0.001   | .562                            | 0.06    |
| Left Occipital                            | .375                                | 0.21    | .518                               | 0.07    | -.06                            | 0.85    |
| Right Frontal Polar                       | .492                                | 0.09    | .592                               | 0.03    | 0                               | .99     |
| Right Frontal                             | .375                                | 0.21    | .314                               | 0.3     | .047                            | 0.88    |
| Right Temporal                            | .261                                | 0.39    | .428                               | 0.15    | .166                            | 0.59    |
| Right Parietal                            | .351                                | 0.24    | .366                               | .22     | .13                             | 0.68    |
| Right Occipital                           | .314                                | 0.3     | .477                               | 0.1     | .206                            | 0.5     |
| EEG beta Coherence                        | Pearson Correlation Cognitive Score | P value | Pearson Correlation Language Score | P value | Pearson Correlation Motor Score | P value |
| Left Frontal Polar to Right Frontal Polar | .499                                | 0.08    | .16                                | 0.6     | -.278                           | 0.36    |
| Left Frontal to Right Frontal             | .304                                | 0.31    | -.148                              | 0.63    | -.591*                          | 0.03    |
| Left Temporal to Right Temporal           | -.223                               | 0.46    | -.237                              | 0.44    | -.404                           | 0.17    |
| Left Parietal to Right Parietal           | -.094                               | 0.76    | -.203                              | 0.5     | -.394                           | 0.18    |
| Left Occipital to Right Occipital         | .245                                | 0.42    | .191                               | 0.53    | .168                            | 0.58    |
| Left Frontal Polar to Left Occipital      | .462                                | 0.11    | .127                               | 0.68    | -.241                           | 0.43    |
| Right Frontal Polar to Right Occipital    | 0.4                                 | 0.18    | .446                               | 0.13    | .262                            | 0.39    |

**Supplemental Table 2: EEG alpha power and coherence correlations with 18 month scores**

| EEG Alpha power                           | Pearson Correlation Cognitive Score | P value | Pearson Correlation Language Score | P value | Pearson Correlation Motor Score | P value |
|-------------------------------------------|-------------------------------------|---------|------------------------------------|---------|---------------------------------|---------|
| Left Frontal Polar                        | .302                                | 0.32    | .344                               | 0.25    | -.021                           | 0.95    |
| Left Frontal                              | .433                                | 0.14    | .291                               | 0.34    | -.175                           | 0.57    |
| Left Temporal                             | -.055                               | 0.86    | .386                               | 0.19    | .102                            | 0.74    |
| Left Parietal                             | .255                                | 0.4     | .231                               | 0.45    | -.297                           | 0.32    |
| Left Occipital                            | -.002                               | 0.99    | .411                               | 0.16    | -.056                           | 0.86    |
| Right Frontal Polar                       | .209                                | 0.49    | .49                                | 0.09    | .118                            | 0.7     |
| Right Frontal                             | .094                                | 0.76    | .229                               | 0.45    | .177                            | 0.56    |
| Right Temporal                            | .163                                | 0.59    | .417                               | 0.16    | .257                            | 0.4     |
| Right Parietal                            | .155                                | 0.613   | .415                               | 0.16    | .247                            | 0.42    |
| Right Occipital                           | .241                                | 0.43    | .47                                | 0.11    | .075                            | 0.81    |
| EEG Alpha Coherence                       | Pearson Correlation Cognitive Score | P value | Pearson Correlation Language Score | P value | Pearson Correlation Motor Score | P value |
| Left Frontal Polar to Right Frontal Polar | .226                                | 0.46    | .022                               | 0.94    | -.27                            | 0.37    |
| Left Frontal to Right Frontal             | .038                                | 0.9     | -.510                              | 0.075   | -.532                           | 0.061   |
| Left Temporal to Right Temporal           | -.203                               | 0.5     | .206                               | 0.5     | -.59                            | 0.85    |
| Left Parietal to Right Parietal           | -.128                               | 0.68    | -.167                              | 0.59    | -.185                           | 0.55    |
| Left Occipital to Right Occipital         | -.031                               | 0.92    | -.206                              | 0.5     | -.177                           | 0.56    |
| Left Frontal Polar to Left Occipital      | -.088                               | 0.78    | -.137                              | 0.66    | -.283                           | 0.35    |
| Right Frontal Polar to Right Occipital    | -.004                               | 0.99    | .092                               | 0.77    | -.003                           | .99     |

Accepted Article

**Supplemental Table 3: EEG Delta power and coherence correlations with 18 month scores**

| EEG Delta power                           | Pearson Correlation Cognitive Score | P value | Pearson Correlation Language Score | P value | Pearson Correlation Motor Score | P value |
|-------------------------------------------|-------------------------------------|---------|------------------------------------|---------|---------------------------------|---------|
| Left Frontal Polar                        | .140                                | 0.65    | .394                               | 0.18    | .170                            | 0.58    |
| Left Frontal                              | .681*                               | 0.01    | .551                               | 0.05    | .099                            | 0.75    |
| Left Temporal                             | .303                                | 0.31    | .672*                              | 0.01    | .288                            | 0.34    |
| Left Parietal                             | .579*                               | 0.04    | .636*                              | 0.02    | -.094                           | 0.76    |
| Left Occipital                            | .155                                | 0.61    | .589*                              | 0.03    | .16                             | 0.6     |
| Right Frontal Polar                       | .328                                | 0.27    | .535                               | 0.06    | .219                            | 0.47    |
| Right Frontal                             | .312                                | 0.3     | .454                               | 0.12    | .366                            | 0.22    |
| Right Temporal                            | .303                                | 0.31    | .491                               | 0.09    | .412                            | 0.16    |
| Right Parietal                            | .535                                | 0.06    | .625*                              | 0.02    | .331                            | 0.27    |
| Right Occipital                           | .575*                               | 0.04    | .683*                              | 0.01    | .315                            | 0.29    |
| EEG Delta Coherence                       | Pearson Correlation Cognitive Score | P value | Pearson Correlation Language Score | P value | Pearson Correlation Motor Score | P value |
| Left Frontal Polar to Right Frontal Polar | .28                                 | 0.36    | -.16                               | 0.6     | -.308                           | 0.31    |
| Left Frontal to Right Frontal             | 0.0                                 | 1       | -.407                              | 0.17    | -.002                           | 0.99    |
| Left Temporal to Right Temporal           | .039                                | 0.9     | .397                               | 0.18    | .221                            | 0.47    |
| Left Parietal to Right Parietal           | -.220                               | 0.47    | -.386                              | 0.19    | -.020                           | 0.95    |
| Left Occipital to Right Occipital         | .123                                | 0.69    | -.336                              | 0.26    | -.078                           | 0.8     |
| Left Frontal Polar to Left Occipital      | .023                                | 0.9     | -.128                              | 0.68    | .092                            | 0.77    |
| Right Frontal Polar to Right Occipital    | .069                                | 0.82    | -.146                              | 0.63    | -.143                           | 0.64    |

Accepted Article

**Supplemental Table 4: EEG gamma power and coherence correlations with 18-month scores**

| EEG Gamma power                           | Pearson Correlation Cognitive Score | P value | Pearson Correlation Language Score | P value | Pearson Correlation Motor Score | P value |
|-------------------------------------------|-------------------------------------|---------|------------------------------------|---------|---------------------------------|---------|
| Left Frontal Polar                        | .132                                | 0.67    | .323                               | 0.28    | .199                            | 0.52    |
| Left Frontal                              | .693*                               | 0.009   | .482                               | 0.1     | .046                            | 0.89    |
| Left Temporal                             | .150                                | 0.62    | .330                               | 0.27    | .152                            | 0.62    |
| Left Parietal                             | .329                                | 0.27    | .139                               | 0.65    | -.347                           | 0.25    |
| Left Occipital                            | .132                                | 0.67    | .175                               | 0.57    | -.093                           | 0.76    |
| Right Frontal Polar                       | .15                                 | 0.63    | .382                               | 0.2     | .123                            | 0.69    |
| Right Frontal                             | .262                                | 0.39    | .121                               | 0.69    | .164                            | 0.59    |
| Right Temporal                            | .214                                | 0.48    | .438                               | 0.14    | .32                             | 0.29    |
| Right Parietal                            | .134                                | 0.66    | .245                               | 0.42    | .371                            | 0.21    |
| Right Occipital                           | .094                                | 0.76    | .308                               | 0.31    | .19                             | 0.53    |
| EEG Gamma Coherence                       | Pearson Correlation Cognitive Score | P value | Pearson Correlation Language Score | P value | Pearson Correlation Motor Score | P value |
| Left Frontal Polar to Right Frontal Polar | .362                                | 0.22    | -.163                              | 0.59    | -.367                           | 0.22    |
| Left Frontal to Right Frontal             | .108                                | 0.73    | -.193                              | 0.53    | -.455                           | 0.12    |
| Left Temporal to Right Temporal           | -.101                               | 0.74    | -.185                              | 0.55    | -.260                           | 0.39    |
| Left Parietal to Right Parietal           | -.1                                 | 0.75    | -.187                              | 0.54    | -.230                           | 0.45    |
| Left Occipital to Right Occipital         | .036                                | 0.91    | -.127                              | 0.68    | -.036                           | 0.91    |
| Left Frontal Polar to Left Occipital      | .185                                | 0.55    | -.059                              | 0.85    | -.102                           | 0.74    |
| Right Frontal Polar to Right Occipital    | .121                                | 0.69    | -.083                              | 0.79    | -.038                           | 0.9     |

Accepted Article

**Supplemental Table 5: EEG low gamma power and coherence correlations with 18-month scores**

| EEG low gamma power                       | Pearson Correlation Cognitive Score | P value | Pearson Correlation Language Score | P value | Pearson Correlation Motor Score | P value |
|-------------------------------------------|-------------------------------------|---------|------------------------------------|---------|---------------------------------|---------|
| Left Frontal Polar                        | .487                                | 0.09    | .512                               | 0.07    | .132                            | 0.67    |
| Left Frontal                              | .783*                               | 0.002   | .419                               | 0.16    | -.081                           | 0.79    |
| Left Temporal                             | .159                                | 0.6     | .328                               | 0.27    | .118                            | 0.7     |
| Left Parietal                             | .369                                | 0.2     | .1                                 | 0.75    | -.367                           | 0.22    |
| Left Occipital                            | .295                                | 0.33    | .38                                | 0.2     | .028                            | 0.93    |
| Right Frontal Polar                       | .34                                 | 0.26    | .478                               | 0.1     | .112                            | 0.72    |
| Right Frontal                             | .344                                | 0.25    | .203                               | 0.51    | .087                            | 0.78    |
| Right Temporal                            | .216                                | 0.48    | .335                               | 0.26    | .172                            | 0.58    |
| Right Parietal                            | .076                                | 0.81    | .142                               | 0.64    | .225                            | 0.46    |
| Right Occipital                           | .148                                | 0.63    | .338                               | 0.26    | .188                            | 0.54    |
| EEG low gamma Coherence                   | Pearson Correlation Cognitive Score | P value | Pearson Correlation Language Score | P value | Pearson Correlation Motor Score | P value |
| Left Frontal Polar to Right Frontal Polar | .486                                | 0.09    | .148                               | 0.63    | -.048                           | 0.88    |
| Left Frontal to Right Frontal             | .137                                | 0.65    | -.095                              | 0.76    | -.312                           | 0.3     |
| Left Temporal to Right Temporal           | -.264                               | 0.38    | -.36                               | 0.23    | -.334                           | 0.27    |
| Left Parietal to Right Parietal           | -.098                               | 0.75    | -.161                              | 0.6     | -.217                           | 0.48    |
| Left Occipital to Right Occipital         | .154                                | 0.62    | .331                               | 0.27    | .323                            | 0.28    |
| Left Frontal Polar to Left Occipital      | .349                                | 0.24    | .236                               | 0.44    | .177                            | 0.56    |
| Right Frontal Polar to Right Occipital    | .273                                | 0.37    | .346                               | 0.25    | .369                            | 0.22    |

Accepted Article

**Supplemental Table 6: EEG theta power and coherence correlations with 18-month scores**

| EEG theta power                           | Pearson Correlation Cognitive Score | P value | Pearson Correlation Language Score | P value | Pearson Correlation Motor Score | P value |
|-------------------------------------------|-------------------------------------|---------|------------------------------------|---------|---------------------------------|---------|
| Left Frontal Polar                        | .053                                | 0.86    | .153                               | 0.62    | .047                            | 0.88    |
| Left Frontal                              | .117                                | 0.7     | .206                               | 0.5     | -.032                           | .92     |
| Left Temporal                             | -.013                               | 0.97    | .391                               | 0.19    | .122                            | 0.69    |
| Left Parietal                             | .138                                | 0.65    | .154                               | 0.62    | -.285                           | 0.35    |
| Left Occipital                            | -.122                               | 0.72    | .367                               | 0.22    | -.028                           | .928    |
| Right Frontal Polar                       | .044                                | 0.89    | .31                                | 0.3     | .12                             | 0.7     |
| Right Frontal                             | -.045                               | 0.88    | .117                               | 0.71    | .193                            | 0.53    |
| Right Temporal                            | .079                                | 0.8     | .319                               | 0.29    | .243                            | 0.42    |
| Right Parietal                            | .08                                 | 0.8     | .338                               | 0.26    | .216                            | 0.48    |
| Right Occipital                           | .077                                | 0.8     | .344                               | 0.25    | .03                             | 0.92    |
| EEG theta Coherence                       | Pearson Correlation Cognitive Score | P value | Pearson Correlation Language Score | P value | Pearson Correlation Motor Score | P value |
| Left Frontal Polar to Right Frontal Polar | .024                                | 0.94    | -.274                              | 0.37    | -.315                           | 0.3     |
| Left Frontal to Right Frontal             | -.006                               | 0.99    | -.369                              | 0.22    | -.055                           | 0.86    |
| Left Temporal to Right Temporal           | -.034                               | 0.91    | .308                               | 0.31    | .179                            | 0.56    |
| Left Parietal to Right Parietal           | -.241                               | 0.43    | -.286                              | 0.34    | -.211                           | 0.49    |
| Left Occipital to Right Occipital         | -.022                               | 0.94    | -.352                              | 0.24    | -.146                           | 0.64    |
| Left Frontal Polar to Left Occipital      | -.192                               | 0.53    | -.197                              | 0.52    | -.077                           | 0.8     |
| Right Frontal Polar to Right Occipital    | -.173                               | 0.57    | -.046                              | 0.88    | -.002                           | 0.99    |

Accepted Article
